# Supplementary material for: Ablação por Cateter é Superior a Drogas Antiarrítmicas como Tratamento de primeira linha para Fibrilação Atrial: uma Revisão Sistemática e Metanálise
Source: PubMed Central journal article supplement (PMC9352118; doi:10.36660/abc.20210477), 2022-04-25

**Supplementary Table 1.** Critical appraisal of individual studies according to the Cochrane Collaboration’s tool for assessing risk of bias in randomized trials.

| Study           | Selection bias | Performance bias | Detection bias | Attrition bias | Reporting bias |
|-----------------|----------------|------------------|----------------|----------------|----------------|
| RAAFT-1 2005    | Low            | High             | Unclear        | Low            | Low            |
| MANTRA-PAF 2012 | Low            | High             | Low            | Low            | Low            |
| RAAFT-2 2014    | Low            | High             | Low            | Low            | Low            |
| STOP-AF 2020    | Low            | High             | Unclear        | Low            | Low            |
| EARLY-AF 2020   | Low            | High             | Low            | Low            | Low            |

**Supplementary Figure 1.** Funnel plot for recurrences of atrial tachyarrhythmias (1A), symptomatic AF recurrences (1B), hospitalizations (1C), and symptomatic bradycardia (1D) showed no definitive evidence of publication bias. Sensitivity analyses excluding each study found no change in significance of results.

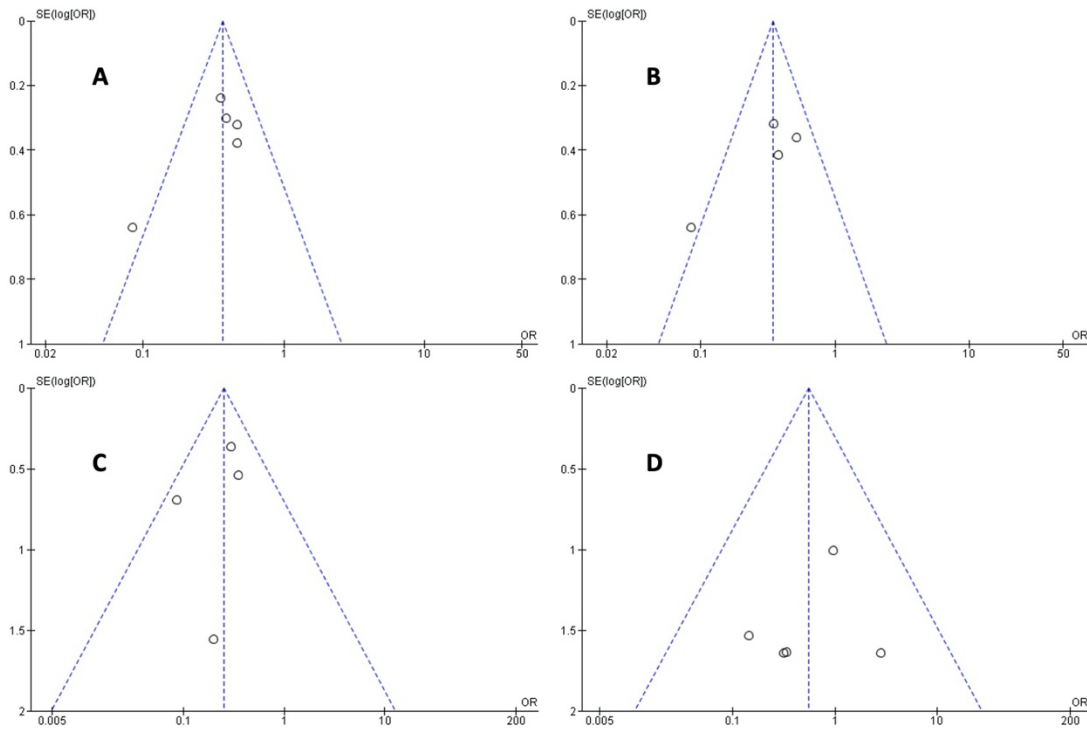

Supplement: 2021-0477-supplementary.pdf [file 2021-0477-supplementary.pdf]
